# Supplementary material
Source: publisher figshare collection journal article supplement (https://diabetesjournals.figshare.com/articles/dataset/_/22009586)
Supplement: Supplementary file 2 [file 1]

**Supplemental Table 4: Hazard Ratios by Treatment Interval**

| Month   | No of events |           | Chi-Square Test | Hazard Ratio (95% CI) |                      |
|---------|--------------|-----------|-----------------|-----------------------|----------------------|
|         | Abatacept    | Placebo   |                 | Cumulative            | Interval             |
| 6 mos.  | 5 (7.17)     | 10 (7.83) | 1.35            | 0.545 (0.198, 1.50)   | 0.545 (0.198, 1.50)  |
| 12 mos. | 2 (3.92)     | 6 (4.08)  | 3.09            | 0.470 (0.207, 1.06)   | 0.348 (0.0869, 1.39) |
| 18 mos. | 5 (6.03)     | 7 (5.97)  | 3.19            | 0.545 (0.281, 1.06)   | 0.706 (0.228, 2.19)  |
| 24 mos. | 4 (5.03)     | 6 (4.97)  | 3.57            | 0.569 (0.317, 1.02)   | 0.659 (0.191, 2.28)  |
| 30 mos. | 1 (2.55)     | 4 (2.45)  | 5.03            | 0.527 (0.303, 0.918)  | 0.240 (0.0415, 1.39) |
| 36 mos. | 5 (3.81)     | 2 (3.19)  | 3.15            | 0.628 (0.374, 1.06)   | 2.10 (0.474, 9.27)   |
| 42 mos. | 3 (2.78)     | 2 (2.22)  | 2.71            | 0.663 (0.403, 1.09)   | 1.19 (0.205, 6.98)   |
| 48 mos. | 2 (2.22)     | 2 (1.78)  | 2.72            | 0.671 (0.414, 1.09)   | 0.800 (0.111, 5.75)  |
| 54 mos. | 2 (1.13)     | 0 (0.872) | 1.98            | 0.716 (0.445, 1.15)   | -                    |
| 60 mos. | 0 (1.01)     | 2 (0.985) | 2.68            | 0.681 (0.426, 1.09)   | -                    |
| 66 mos. | 0 (0.544)    | 1 (0.456) | 3.09            | 0.664 (0.417, 1.06)   | -                    |
| 72 mos. | 1 (2.75)     | 4 (2.25)  | 4.46            | 0.620 (0.396, 0.973)  | 0.205 (0.0353, 1.2)  |
| 78 mos. | 3 (1.88)     | 0 (1.13)  | 3.29            | 0.671 (0.431, 1.04)   | -                    |
| 84 mos. | 0 (0)        | 0 (0.0)   | 3.29            | 0.671 (0.431, 1.04)   | -                    |
| 90 mos. | 2 (1.08)     | 0 (0.917) | 2.50            | 0.710 (0.459, 1.1)    | -                    |
