# Supplementary material
Source: publisher figshare collection journal article supplement (https://diabetesjournals.figshare.com/articles/dataset/_/22009586)
Supplement: Supplementary file 4 [file 1]

**Supplemental Table 6A: Adverse Events frequencies by severity\***

| Severity<br>(Grade) | Treatment Group      |                    |
|---------------------|----------------------|--------------------|
|                     | Abatacept<br>No. (%) | Placebo<br>No. (%) |
| 0/1                 | 32 (31.7)            | 29 (26.1)          |
| 2                   | 46 (45.5)            | 68 (61.3)          |
| 3                   | 22 (21.8)            | 11 (9.9)           |
| 4                   | 1 (1.0)              | 3 (2.7)            |
| 5                   | 0 (0)                | 0 (0)              |
| Total               | 101 (100.0)          | 111 (100.0)        |

\*possibly or probably related to study drug

**Supplemental Table 6B: Severe adverse events\***

| Adverse Effect Category                                                                | Abatacept        |                           | Placebo          |                           |
|----------------------------------------------------------------------------------------|------------------|---------------------------|------------------|---------------------------|
|                                                                                        | No. of<br>Events | No. of<br>Subjects<br>(%) | No. of<br>Events | No. of<br>Subjects<br>(%) |
| Surgical and medical procedures                                                        | 0                | 0 (0.0)                   | 1                | 1 (0.9)                   |
| Nervous system disorders                                                               | 0                | 0 (0.0)                   | 1                | 1 (0.9)                   |
| Neoplasms benign, malignant and unspecified<br>(inc cysts and polyps cysts and polyps) | 2                | 2 (2.0)                   | 0                | 0 (0.0)                   |
| Infections and infestations                                                            | 0                | 0 (0.0)                   | 1                | 1 (0.9)                   |
| Total Events                                                                           | 2                | ---                       | 3                | ---                       |

\*possibly or probably related to study drug
