# Supplementary material
Source: publisher figshare collection journal article supplement (https://diabetesjournals.figshare.com/articles/dataset/_/22009586)
Supplement: Supplementary file 5 [file 1]

**Supplemental Table 5: Adverse events**

| Adverse Effect Category                                                                   | Abatacept     |                     | Placebo       |                     |
|-------------------------------------------------------------------------------------------|---------------|---------------------|---------------|---------------------|
|                                                                                           | No. of Events | No. of Subjects (%) | No. of Events | No. of Subjects (%) |
|                                                                                           |               |                     |               |                     |
| Infections and infestations                                                               | 82            | 38 (37.6)           | 89            | 45 (40.5)           |
| Gastrointestinal disorders                                                                | 34            | 22 (21.8)           | 29            | 21 (18.9)           |
| Musculoskeletal and connective tissue                                                     | 25            | 19 (18.8)           | 26            | 15 (13.5)           |
| Respiratory, thoracic and mediastinal disorders                                           | 25            | 16 (15.8)           | 22            | 15 (13.5)           |
| General disorders and administration site                                                 | 17            | 14 (13.9)           | 24            | 20 (18.0)           |
| Skin and subcutaneous tissue disorders*                                                   | 22            | 17 (16.8)           | 15            | 10 (9.0)            |
| Nervous system disorders                                                                  | 19            | 13 (12.9)           | 13            | 8 (7.2)             |
| Injury, poisoning and procedural                                                          | 19            | 15 (14.9)           | 12            | 8 (7.2)             |
| Psychiatric disorders                                                                     | 8             | 7 (6.9)             | 13            | 9 (8.1)             |
| Surgical and medical procedures                                                           | 9             | 9 (8.9)             | 9             | 9 (8.1)             |
| Investigations                                                                            | 5             | 3 (3.0)             | 12            | 10 (9.0)            |
| Metabolism and nutrition disorders                                                        | 6             | 5 (5.0)             | 6             | 4 (3.6)             |
| Eye disorders                                                                             | 6             | 5 (5.0)             | 5             | 4 (3.6)             |
| Reproductive system and breast disorders                                                  | 7             | 3 (3.0)             | 3             | 3 (2.7)             |
| Blood and lymphatic system disorders                                                      | 3             | 3 (3.0)             | 7             | 7 (6.3)             |
| Cardiac disorders                                                                         | 5             | 3 (3.0)             | 3             | 3 (2.7)             |
| Vascular disorders                                                                        | 2             | 2 (2.0)             | 4             | 4 (3.6)             |
| Endocrine disorders                                                                       | 4             | 3 (3.0)             | 2             | 2 (1.8)             |
| Pregnancy, puerperium and perinatal                                                       | 5             | 2 (2.0)             | 0             | 0 (0.0)             |
| Neoplasms benign, malignant and unspecified (including cysts and polyps cysts and polyps) | 4             | 4 (4.0)             | 2             | 2 (1.8)             |
| Immune system disorders                                                                   | 2             | 2 (2.0)             | 3             | 3 (2.7)             |
| Renal and urinary disorders                                                               | 3             | 3 (3.0)             | 1             | 1 (0.9)             |
| Ear and labyrinth disorders                                                               | 2             | 2 (2.0)             | 2             | 2 (1.8)             |
| Hepatobiliary disorders                                                                   | 2             | 2 (2.0)             | 0             | 0 (0.0)             |
| Total Events                                                                              | 314           | ---                 | 301           | ---                 |
