# Supplementary material
Source: publisher figshare collection journal article supplement (https://diabetesjournals.figshare.com/articles/dataset/_/22009586)
Supplement: Supplementary file 7 [file 1]

## Supplemental Tables

**Supplemental Table 1: Settings and Locations where data were collected**

|                                                      |                                                     |
|------------------------------------------------------|-----------------------------------------------------|
| University of Florida                                | University of Oklahoma                              |
| Yale University School of Medicine                   | University of Utah                                  |
| Children's Hospital Los Angeles                      | Baylor College of Medicine                          |
| Stanford University                                  | USF Diabetes Center                                 |
| University of Miami                                  | University of Michigan Health System                |
| Barbara Davis Center for Childhood Diabetes          | Sacred Heart Medical Center                         |
| University of Minnesota                              | Palm Research Center, Inc.                          |
| Benaroya Research Institute                          | Rocky Mountain Diabetes and Osteoporosis Center, PA |
| University of California- San Francisco              | San Raffaele Hospital                               |
| University of Texas Southwestern                     | University of Bristol, UK                           |
| The Hospital for Sick Children                       | Hospital District of Southwest Finland              |
| The University of Pittsburgh                         | Walter and Eliza Hall Institute of Medical Research |
| Columbia University                                  | Royal North Shore Hospital                          |
| Indiana University-Riley Hospital For Children       | University of Cambridge                             |
| Vanderbilt Eskind Diabetes Clinic                    | Skane University Hospital                           |
| University of Chicago                                | Birmingham Children's Hospital UK                   |
| The Children's Mercy Hospital                        | Central Manchester University hospitals             |
| Emory Children's Center                              | Harrogate District Hospital                         |
| Joslin Diabetes Center                               | Taunton & Somerset NHS Foundation Trust             |
| Alberta Children's Hospital                          | Nottingham University Hospitals, Queens Medical Ctr |
| Virginia Commonwealth University                     | Plymouth Diabetes Research Unit                     |
| Ann & Robert H. Lurie Children's Hospital of Chicago | Brighton and Sussex University Hospitals-NHS Trust  |
| University of Iowa, Children's Hospital of Iowa      | University of Helsinki                              |
| UBMD Pediatrics                                      | Technischen Universitaet Muenchen                   |
| Cincinnati Children's Hospital Med Ctr               | Royal Belfast Hospital for Sick Children            |
|                                                      | Women's and Children's Hospital Adelaide            |
