# Supplementary material
Source: publisher figshare collection journal article supplement (https://diabetesjournals.figshare.com/articles/dataset/_/22009586)
Supplement: Supplementary file 8 [file 1]

**Supplemental Table 3: Antibodies for flow cytometry**

| Surface Antibodies <sup>1</sup> |              |              |                |
|---------------------------------|--------------|--------------|----------------|
| Marker                          | Clone        | Format       | Manufacturer   |
| CXCR5                           | RF8B2        | BB515        | BD Biosciences |
| CD38                            | HIT2         | PerCP        | BD Biosciences |
| CD319                           | 235614       | BB700        | BD Biosciences |
| CCR6                            | 11A9         | BB755-P*     | BD Biosciences |
| CD56                            | NCAM16       | BB790-P*     | BD Biosciences |
| CCR4                            | 1G1          | APC          | BD Biosciences |
| CD24                            | ML5          | R718         | BD Biosciences |
| CD45RA                          | HI100        | APC-H7       | BD Biosciences |
| ICOS                            | C398.4A      | BV421        | BD Biosciences |
| CD4                             | RPA-T4       | BV480        | BD Biosciences |
| CD57                            | QA17A04      | BV510        | BioLegend      |
| CD19                            | HIB19        | BV570        | BioLegend      |
| CD45RO                          | UCHL1        | BV605        | BD Biosciences |
| CD27                            | O323         | BV650        | BD Biosciences |
| TIGIT                           | 741182       | BV711        | BD Biosciences |
| IgD                             | IA6-2        | BV750        | BD Biosciences |
| PD-1                            | EH12.1       | BV786        | BD Biosciences |
| CD3                             | HIT3a        | BUV395       | BD Biosciences |
| CD8                             | RPA-T8       | BUV496       | BD Biosciences |
| CD86                            | 2331 (FUN-1) | BUV563       | BD Biosciences |
| CD95                            | DX2          | BUV615       | BD Biosciences |
| IgM                             | UCH-B1       | BUV661       | BD Biosciences |
| CD127                           | HIL-7R-M21   | BUV737       | BD Biosciences |
| CD49b                           | AK-7         | BUV805       | BD Biosciences |
| CXCR3                           | G025H7       | PE           | BioLegend      |
| KLRG1                           | SA231A2      | PE-Dazzle594 | BioLegend      |
| CD25                            | M-A251       | PE-Cy5       | BD Biosciences |
| CCR7                            | 2-L1-A       | PE-Cy7       | BD Biosciences |
| Intracellular Antibodies        |              |              |                |
| Marker                          | Clone        | Format       | Manufacturer   |
| FoxP3                           | 236A/E7      | BB630-P*     | BD Biosciences |
| Ki67                            | B56          | BB660-P*     | BD Biosciences |
| Viability                       |              |              |                |
| Marker                          | Clone        | Format       | Manufacturer   |
| Fixable Viability Stain         |              | 440UV        | BD Biosciences |

\*Denotes BD Bioscience proprietary dyes not commercially available during development

<sup>1</sup> Fixable Viability Stain (BD Biosciences) was added to cells for 10 minutes following thaw for live/dead discrimination. Cells were then washed with FACS buffer and Fc receptor blocking was added using Human TruStain FcX (Biolegend) for 5 minutes prior to a 20 minute incubation with the surface staining cocktail, both made in Brilliant Violet Buffer (BD Biosciences). Cells were washed again and then fixed and permeabilized for 20 minutes using the fix and perm from eBioscience FoxP3/Transcription Factor Staining Buffer Set (ThermoFisher). Intracellular stain was made in a 1X perm buffer from this same kit and incubated with washed cells for 30 minutes after fix/perm. Stained PBMC samples were washed with 1X perm buffer and stored in 1% paraformaldehyde overnight at 4°C. Each step post-thaw, prior to overnight storage, was performed at room temperature and protected from light.

All samples were acquired on a BD Symphony cytometer with FACS Diva software. PMT voltages were adjusted to match 7<sup>th</sup> peak mean fluorescent intensities for parameters using 8 peak rainbow beads (Spherotech) for improved batch-to-batch consistency; this was done for 8 parameters selected to monitor laser performance on the first 6 batches and for all parameters on the remaining 7 batches.
