# Supplementary material
Source: publisher figshare collection journal article supplement (https://diabetesjournals.figshare.com/articles/dataset/_/22009586)

# Adjusted Means of Percent Tfh of mem Tconv

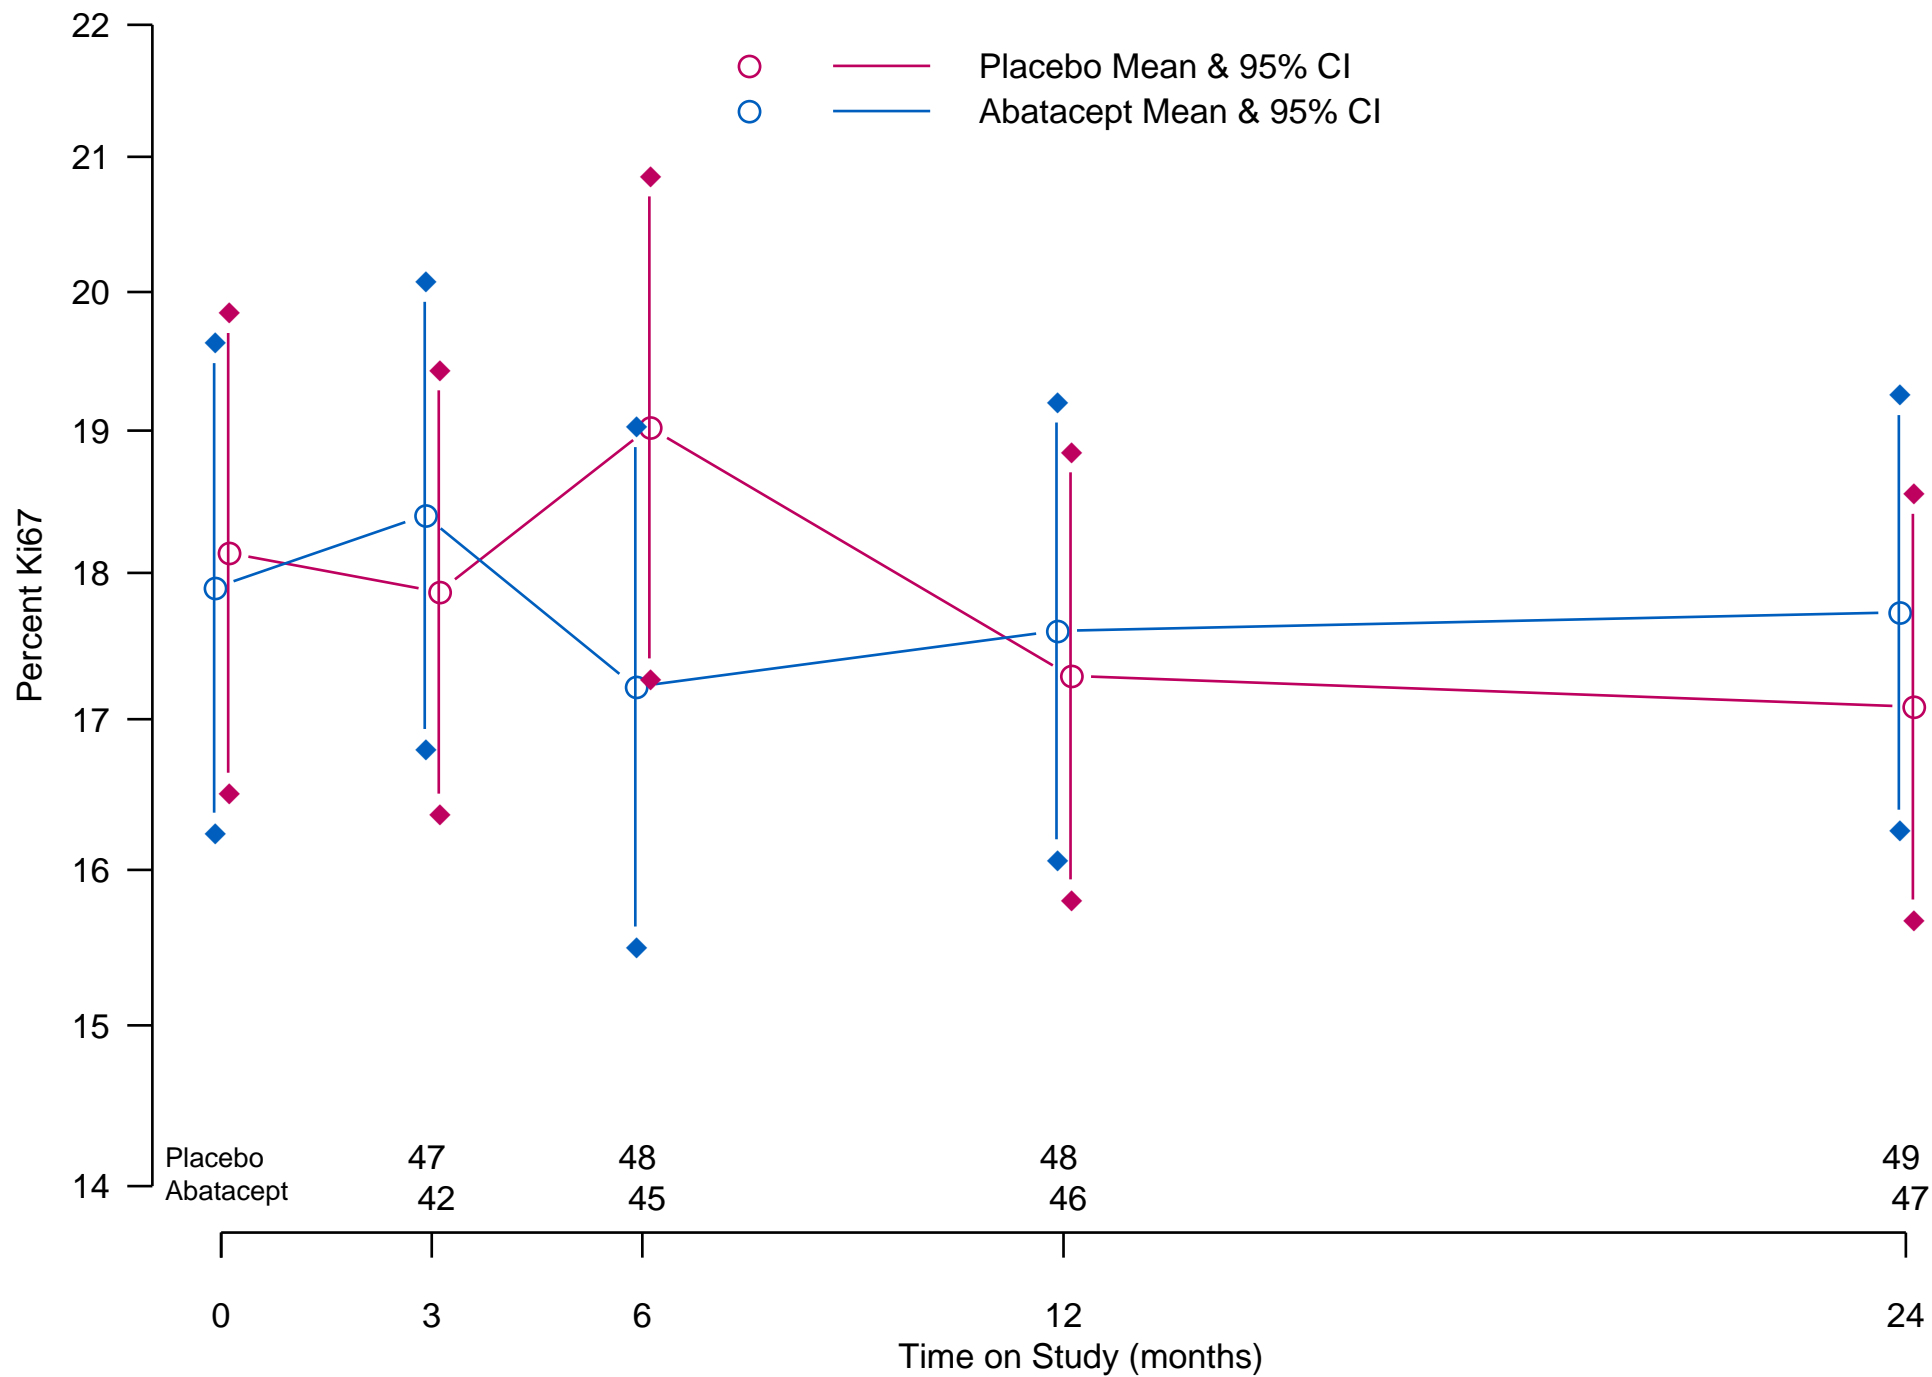

Supplement: Supplementary file 1 [file 1]

# Time to First Positive mIAA

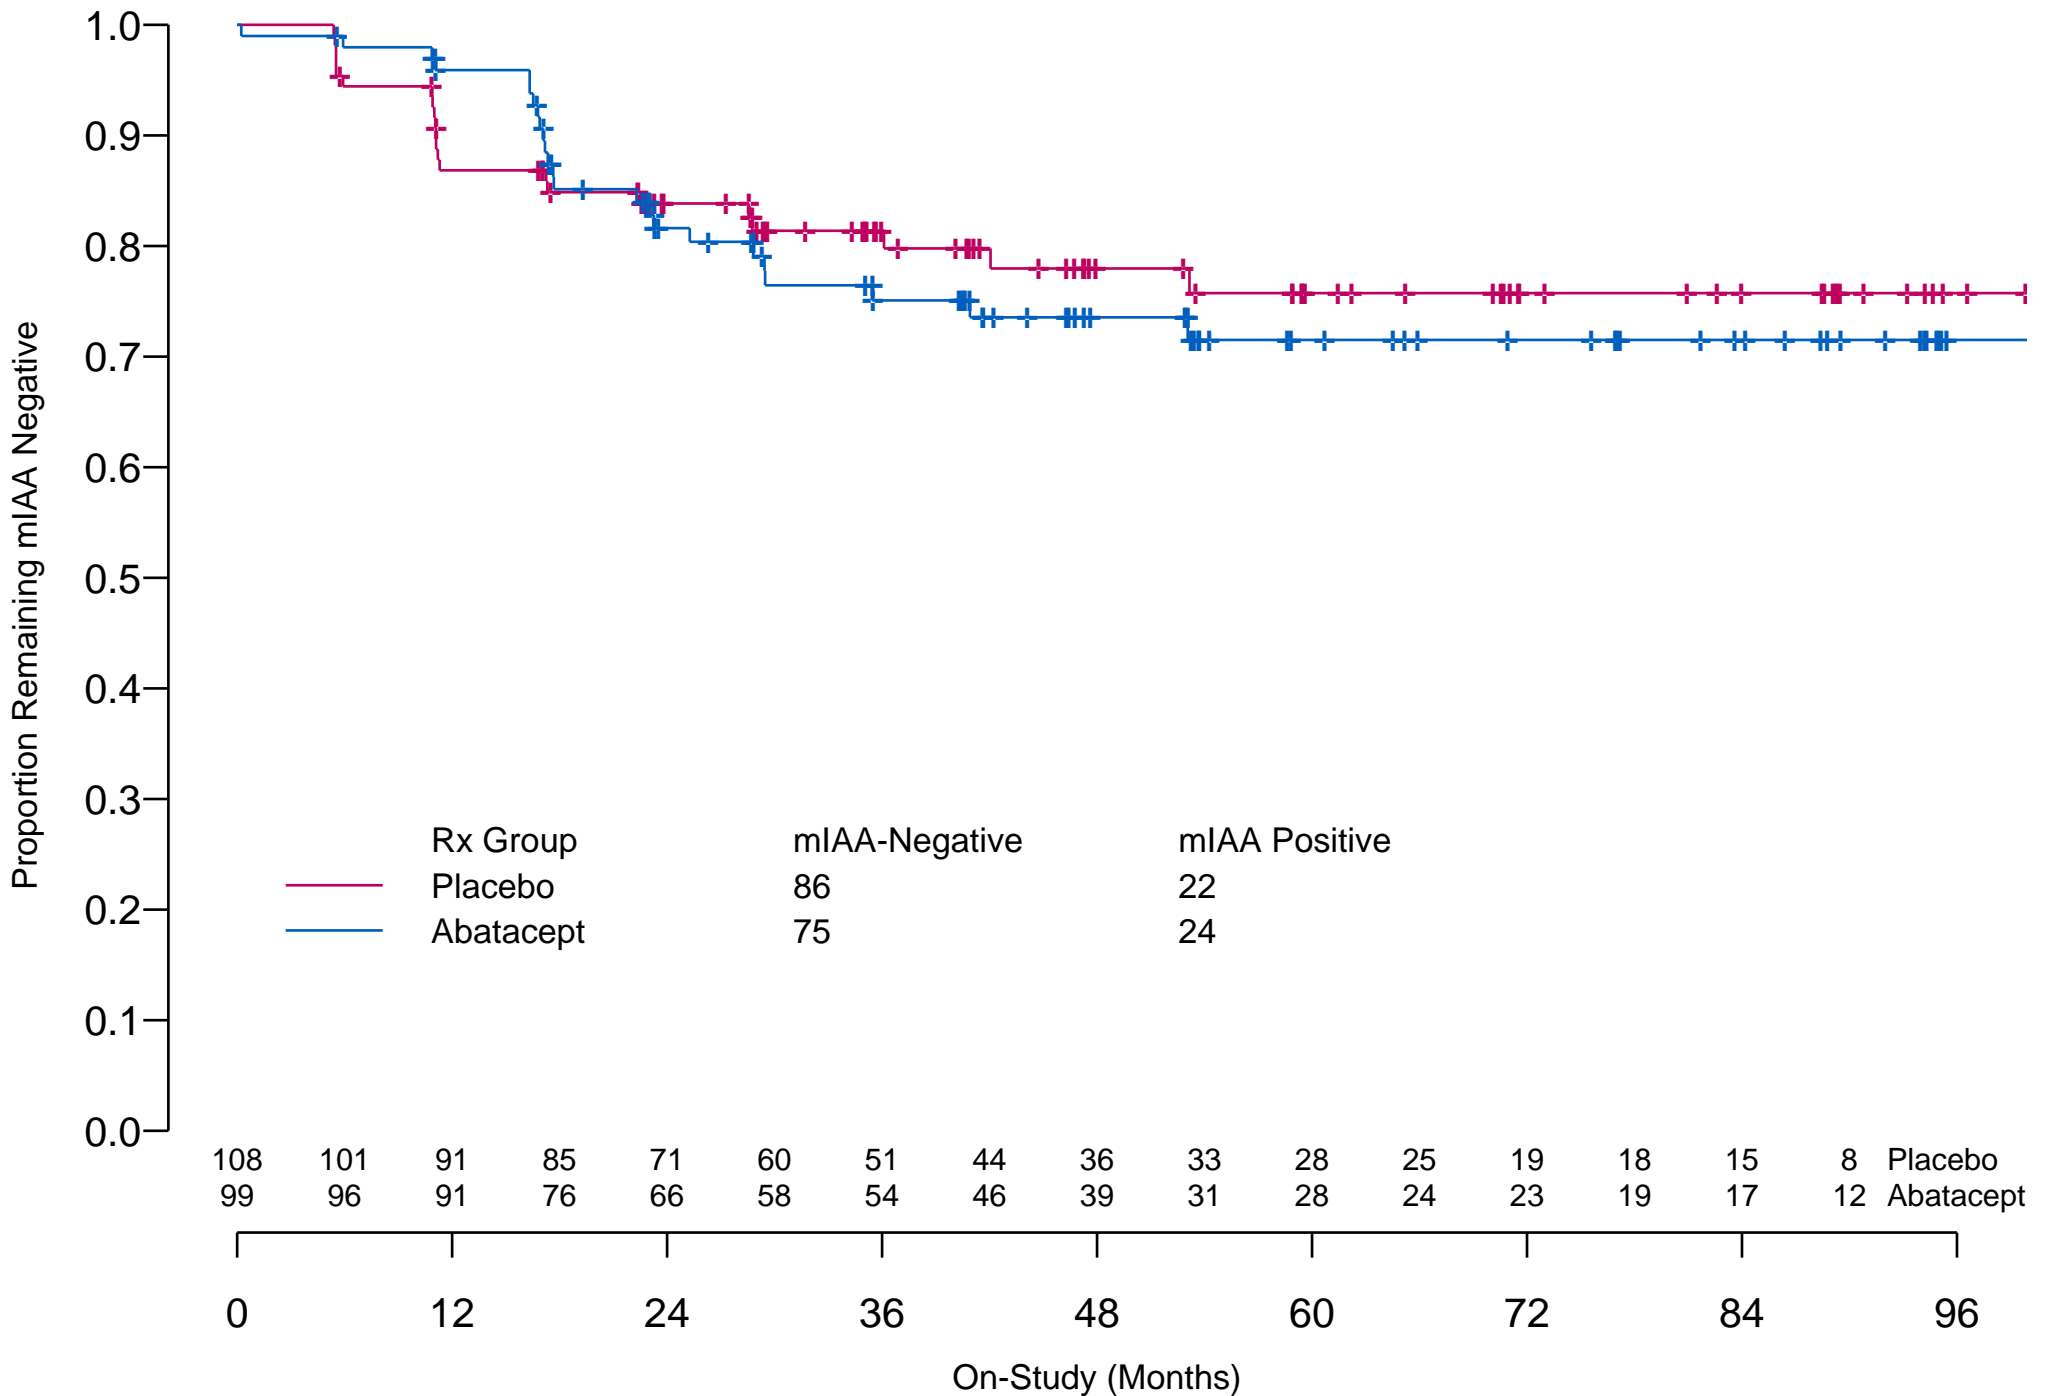

Supplement: Supplementary file 3 [file 1]

## Treatment Hazard Ratios and 95% Confidence Intervals within Subgroups

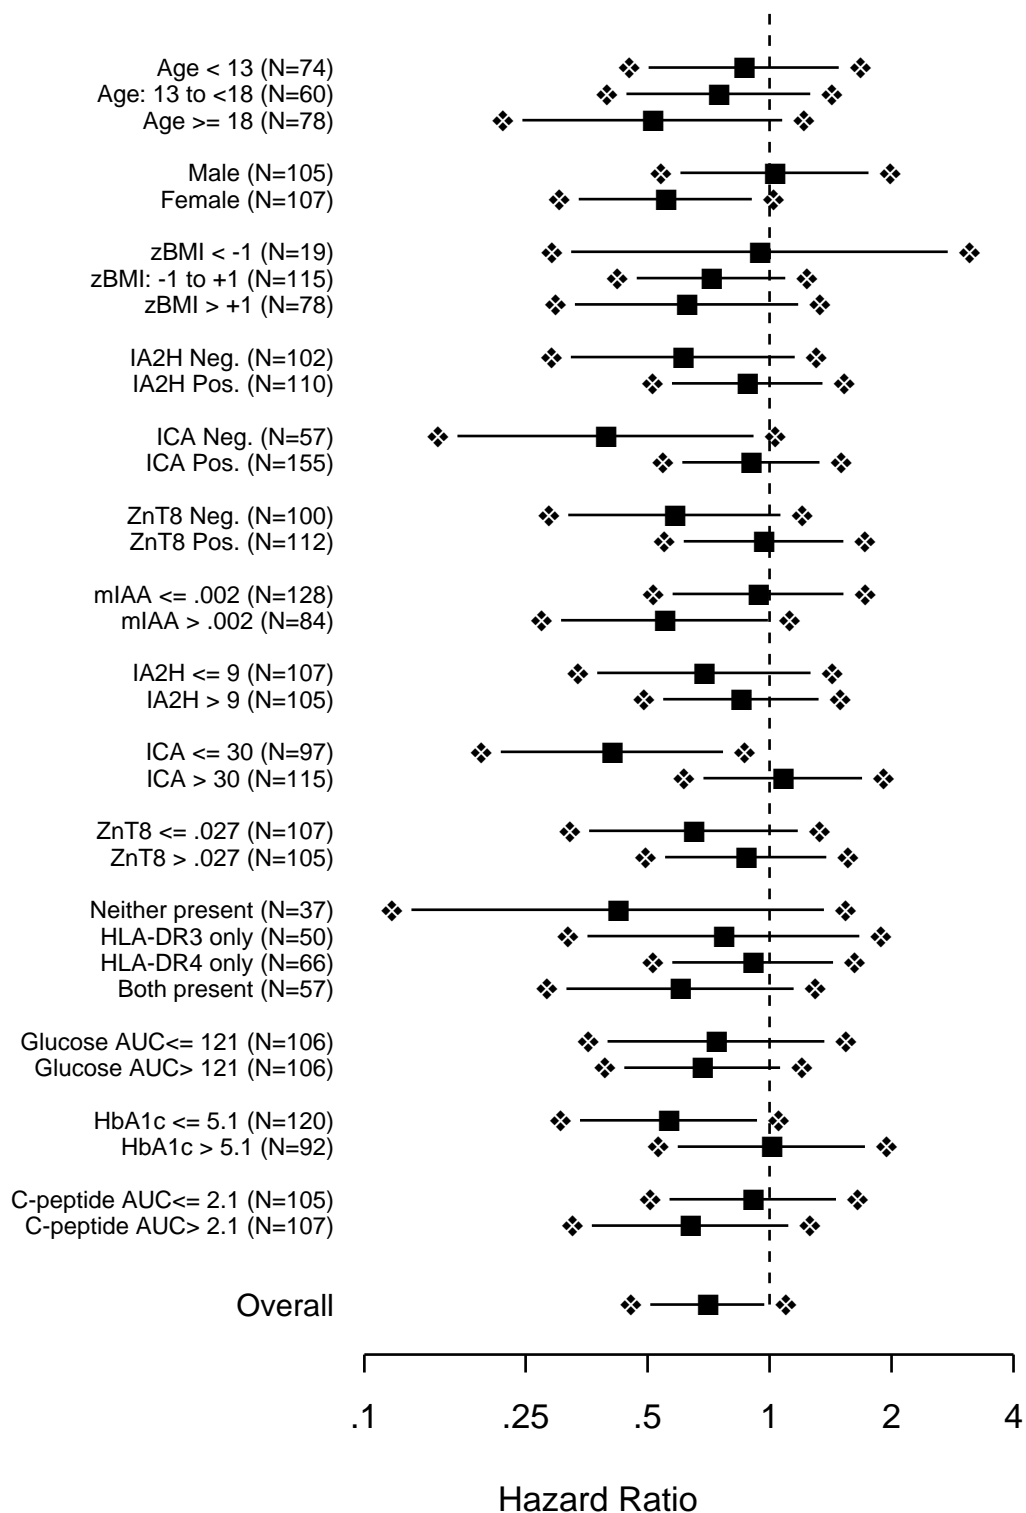

Supplement: Supplementary file 6 [file 1]

## Supplemental Table 2

### Manual of Operations: Procedures for OGTT Sample Handling

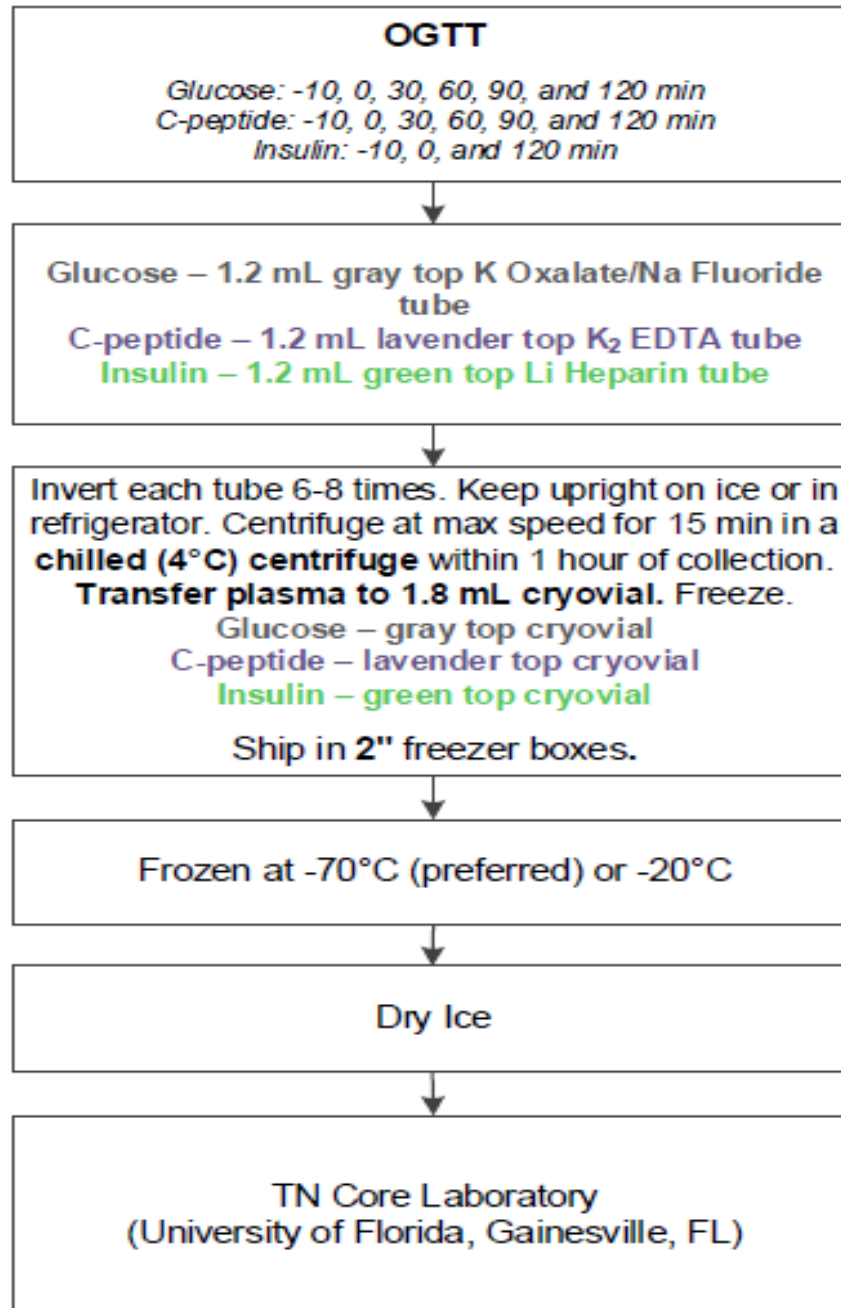

Supplement: Supplementary file 9 [file 1]
